# Supplementary material for: Insights into the Transcriptional Reprogramming in Tomato Response to PSTVd Variants Using Network Approaches
Source: MDPI journal article supplement (doi:10.3390/ijms23115983), 2022-05-26
Supplement: s1 [file s1]

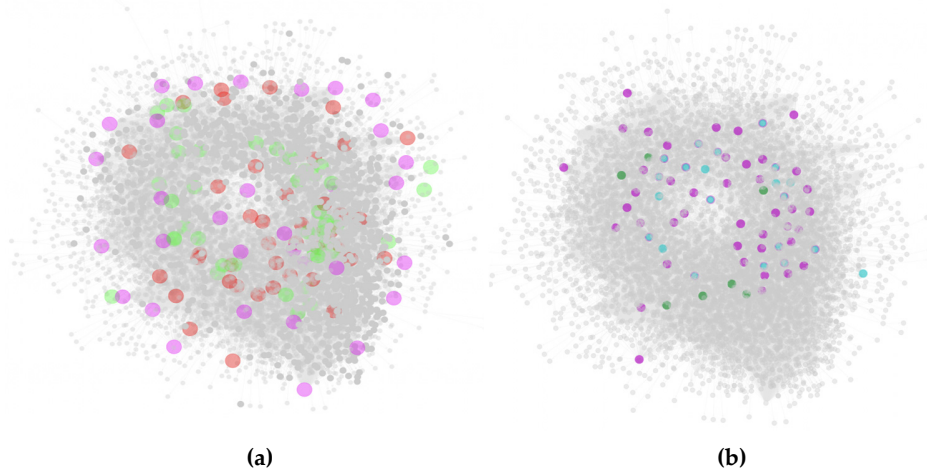

**Figure S1.** Gene Regulatory Global Networks. Each node represents a gene; the edges among nodes depict the regulatory action of one node on another(s). a): GRN for the integrated data is presented on the left; the most prominent nodes highlighted in different colors indicate all the TFs of the families of interest in this study that are present in the global network; bHLH-TF (pink), MYB-TF (green), and ERF-TF (red). b): GRN for only leaf data is presented on the right; the most prominent nodes highlighted in different colors indicate all the TFs of the families of interest in this study that are present in the global network; bHLH-TF (purple), MYB-TF (green), and ERF-TF (cyan).

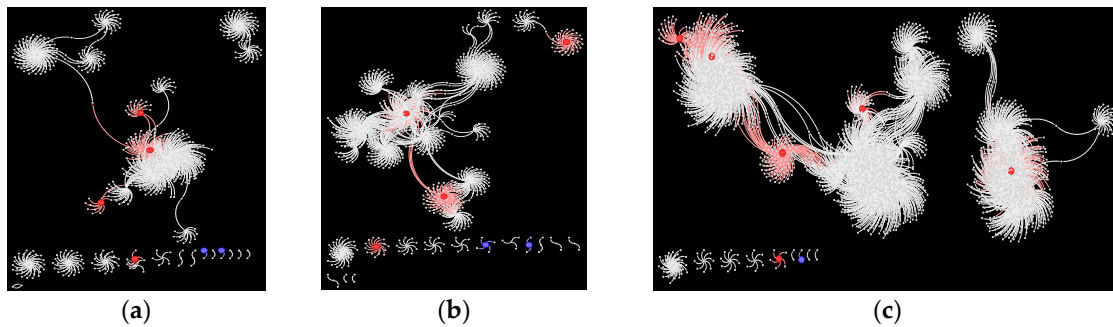

**Figure S2.** Mutual interaction networks. miP-molecule interactions among the different conditions from left to right: a): C. samples, b): PSTVd-Mn, and c): PSTVd-S23. Each node represents a gene, the edges between nodes depict putative interactions among them(regulation). Nodes highlighted in red color represent the hub bHLH-miPs, while the edges of the same color represent their predicted interactions with other molecules. Nodes in blue color represent bHLH-miPs that are not hub genes.

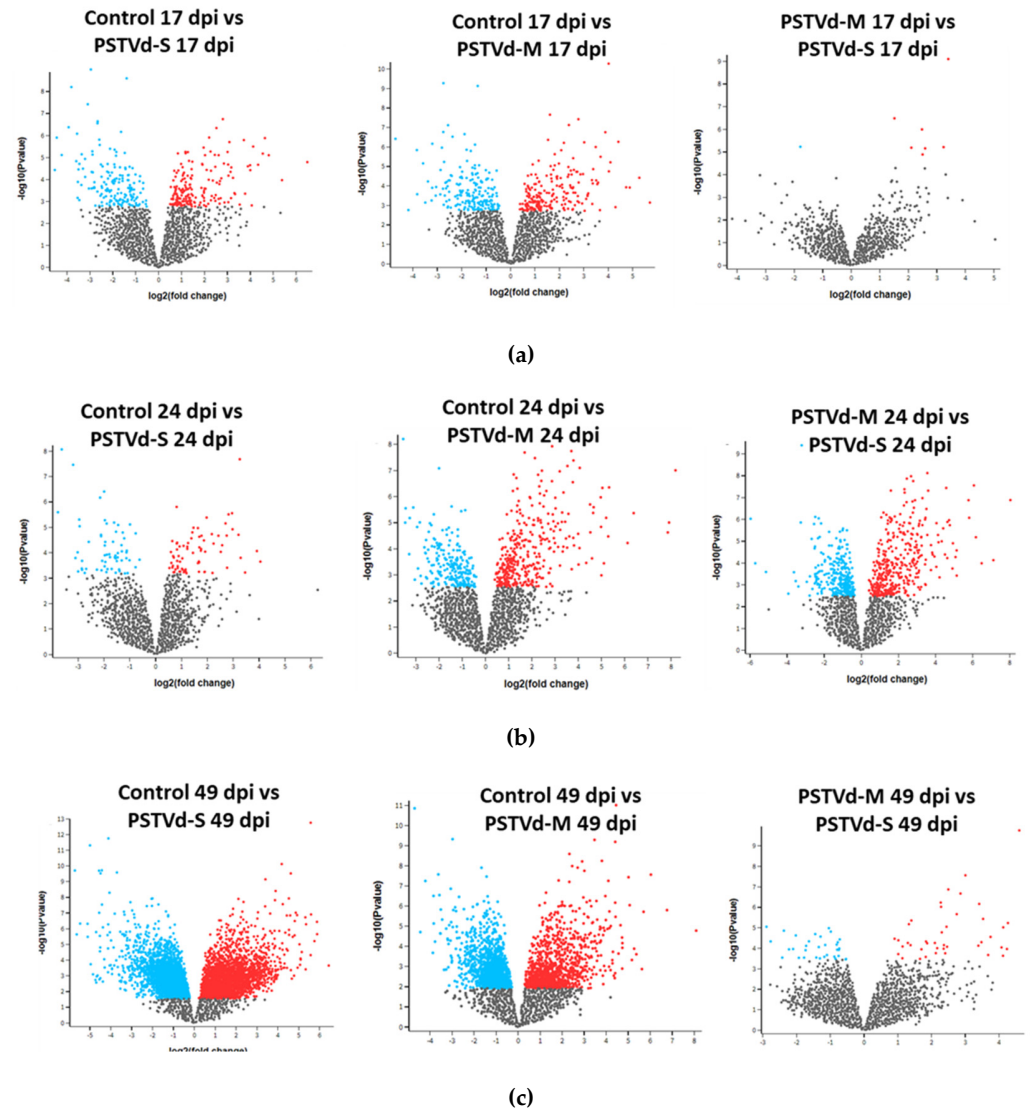

**Figure S3.** Comparative analysis of gene expression among treatments in tomato roots. Volcano plots depicting the differential expression among C., PSTVd-S23 and PSTVd-M strains in the three infection stages. a): early (17 dpi), b); complete symptoms (24 dpi), and c): recovery (49 dpi). Each dot represents one gene, red colored dots denote significantly differentially expressed genes of upregulated genes that achieved an adjusted p-value <0.05, while blue colored dots represent downregulated genes.

**Table S1** List of all the MTRs significant for the three conditions

| Gene ID          | TF family | NES         | P value    | Contition |
|------------------|-----------|-------------|------------|-----------|
| Solyc01g008230.2 | TCP       | -3.49020967 | 0.00048264 | C vs S    |
| Solyc06g070900.2 | TCP       | -3.40100679 | 0.00067138 | C vs S    |
| Solyc01g110490.2 | C3H       | -3.15758282 | 0.00159083 | C vs S    |
| Solyc01g087990.2 | MADS-box  | 3.11312826  | 0.00185116 | C vs S    |
| Solyc05g051200.1 | ERF       | 2.98168476  | 0.00286667 | C vs S    |
| Solyc10g077110.1 | tf3a      | -2.97292849 | 0.00294973 | C vs S    |
| Solyc01g111580.2 | BZIP      | -2.96679446 | 0.00300922 | C vs S    |
| Solyc02g077370.1 | ERF       | 2.94342498  | 0.00324602 | C vs S    |
| Solyc05g053090.1 | GRAS      | 2.91426618  | 0.00356526 | C vs S    |

|                  |             |             |            |        |
|------------------|-------------|-------------|------------|--------|
| Solyc01g111130.2 | bHLH        | -2.87776345 | 0.00400505 | C vs S |
| Solyc06g060490.2 | BZIP        | 2.82899978  | 0.00466937 | C vs S |
| Solyc11g072470.1 | LOB         | 2.79901433  | 0.00512589 | C vs S |
| Solyc02g093130.1 | ERF         | -2.75096964 | 0.00594191 | C vs S |
| Solyc12g049560.1 | ERF         | -2.72200831 | 0.00648865 | C vs S |
| Solyc09g009100.2 | Hsf         | -2.70420572 | 0.00684679 | C vs S |
| Solyc04g074990.2 | ZF-HD       | -2.64713109 | 0.00811779 | C vs S |
| Solyc06g069760.2 | DOF         | -2.5751669  | 0.01001917 | C vs S |
| Solyc01g109880.2 | BZIP        | 2.55792504  | 0.01052988 | C vs S |
| Solyc08g062960.2 | Hsf         | -2.54085675 | 0.01105812 | C vs S |
| Solyc12g100140.1 | bHLH        | -2.52716787 | 0.01149865 | C vs S |
| Solyc10g081350.1 | BZIP        | -2.52416514 | 0.01159734 | C vs S |
| Solyc04g009440.2 | NAC         | 2.52231799  | 0.01165843 | C vs S |
| Solyc02g076810.2 | Trihelix    | -2.50120693 | 0.01237708 | C vs S |
| Solyc08g041820.2 | Homeobox    | -2.49909905 | 0.01245095 | C vs S |
| Solyc06g082590.1 | ERF         | 2.46587721  | 0.01366782 | C vs S |
| Solyc12g008660.1 | ZF-HD       | -2.45771029 | 0.01398259 | C vs S |
| Solyc04g005100.2 | MYB         | 2.45739237  | 0.01399497 | C vs S |
| Solyc02g088190.2 | MYB         | -2.45231432 | 0.01419406 | C vs S |
| Solyc10g083510.1 | GRF         | -2.42811586 | 0.01517749 | C vs S |
| Solyc08g078340.2 | MYB         | -2.40532948 | 0.01615789 | C vs S |
| Solyc06g073730.1 | EIL         | 2.38820768  | 0.01693077 | C vs S |
| Solyc08g076930.1 | bHLH        | 2.37784856  | 0.01741398 | C vs S |
| Solyc06g008200.2 | G2-like     | 2.36462605  | 0.01804828 | C vs S |
| Solyc07g045030.2 | NAC         | 2.33199841  | 0.01970078 | C vs S |
| Solyc03g097820.1 | bHLH        | 2.33095641  | 0.01975566 | C vs S |
| Solyc06g072520.1 | bHLH        | 2.33095641  | 0.01975566 | C vs S |
| Solyc09g089930.1 | ERF         | 2.3162817   | 0.02054289 | C vs S |
| Solyc02g093050.2 | WRKY        | 2.31030967  | 0.02087102 | C vs S |
| Solyc08g077060.2 | LSD         | -2.30453155 | 0.02119282 | C vs S |
| Solyc07g065500.1 | NF-YB       | -2.29297692 | 0.02184933 | C vs S |
| Solyc12g056790.1 | NAC         | 2.2770349   | 0.02278414 | C vs S |
| Solyc09g083360.2 | bHLH        | 2.2725908   | 0.02305085 | C vs S |
| Solyc03g110860.2 | NF-YC       | -2.24330826 | 0.02487694 | C vs S |
| Solyc01g014850.2 | C3H         | -2.20251292 | 0.0276291  | C vs S |
| Solyc02g090820.2 | Hsf         | 2.17805822  | 0.0294017  | C vs S |
| Solyc01g090840.2 | C2H2        | 2.16355787  | 0.0304983  | C vs S |
| Solyc12g088390.1 | C2H2        | 2.16355787  | 0.0304983  | C vs S |
| Solyc06g072040.1 | CONSTANS    | -2.15698809 | 0.03100659 | C vs S |
| Solyc07g020710.2 | CPP         | 2.08785585  | 0.03681084 | C vs S |
| Solyc05g009660.2 | bZIP        | -2.0800722  | 0.03751891 | C vs S |
| Solyc01g096700.2 | MYB_related | -2.0768131  | 0.03781881 | C vs S |
| Solyc02g085610.2 | GBF         | -2.07568583 | 0.03792302 | C vs S |
| Solyc11g072500.1 | DOF         | -2.07481109 | 0.03800405 | C vs S |
| Solyc02g084230.1 | BBR-BCP     | -2.06519596 | 0.03890446 | C vs S |

|                  |              |             |            |        |
|------------------|--------------|-------------|------------|--------|
| Solyc02g080890.2 | WRKY         | 2.06172495  | 0.03923393 | C vs S |
| Solyc03g093610.1 | ERF          | 2.02249216  | 0.04312553 | C vs S |
| Solyc02g081120.2 | knotted-like | -2.01895108 | 0.0434923  | C vs S |
| Solyc07g062710.2 | BZIP         | -1.96510699 | 0.04940186 | C vs S |
| Solyc10g055760.1 | NAC          | 1.96456755  | 0.04946431 | C vs S |
| Solyc07g052760.1 | GeBP         | -2.30254424 | 0.0213     | C vs M |
| Solyc01g097330.2 | bZIP         | 2.26359513  | 0.0236     | C vs M |
| Solyc09g074640.2 | ZF-HD        | -2.16881365 | 0.0301     | C vs M |
| Solyc06g069760.2 | DOF          | -2.13768943 | 0.0325     | C vs M |
| Solyc09g009100.2 | Hsf          | -2.05470047 | 0.0399     | C vs M |
| Solyc11g044560.1 | BZIP         | -2.02853796 | 0.0425     | C vs M |
| Solyc03g098320.2 | MYB          | -2.00696852 | 0.0448     | C vs M |
| Solyc01g008230.2 | TCP          | -3.32513881 | 0.000884   | M vs S |
| Solyc01g109700.2 | bHLH         | -3.13520645 | 0.00172    | M vs S |
| Solyc06g070900.2 | TCP          | -2.97283719 | 0.00295    | M vs S |
| Solyc01g087990.2 | MAD-box      | 2.8936067   | 0.00381    | M vs S |
| Solyc11g072470.1 | LOB          | 2.814547    | 0.00488    | M vs S |
| Solyc05g053090.1 | GRAS         | 2.80120068  | 0.00509    | M vs S |
| Solyc04g005610.2 | NAC          | 2.74520258  | 0.00605    | M vs S |
| Solyc01g109880.2 | BZIP         | 2.63818413  | 0.00834    | M vs S |
| Solyc02g093130.1 | ERF          | -2.54113726 | 0.011      | M vs S |
| Solyc02g077370.1 | ERF          | 2.53305973  | 0.0113     | M vs S |
| Solyc03g120890.2 | GATA         | -2.44145193 | 0.0146     | M vs S |
| Solyc08g077060.2 | LSD1         | -2.26162577 | 0.0237     | M vs S |
| Solyc07g045030.2 | NAC          | 2.23815203  | 0.0252     | M vs S |
| Solyc08g078340.2 | MYB          | -2.13376081 | 0.0329     | M vs S |
| Solyc03g097120.2 | Hsf          | 2.12271572  | 0.0338     | M vs S |
| Solyc04g074990.2 | ZF-HD        | -2.11929425 | 0.0341     | M vs S |
| Solyc08g076930.1 | bHLH         | 2.04815701  | 0.0405     | M vs S |
| Solyc07g065500.1 | MYB          | -2.03118794 | 0.0422     | M vs S |
| Solyc06g069430.2 | MAD-box      | 2.01977398  | 0.0434     | M vs S |
| Solyc06g073730.1 | MYB          | 2.01312508  | 0.0441     | M vs S |
| Solyc05g055940.2 | NF-YB        | 1.9880456   | 0.0468     | M vs S |

**Table S2.** Top 10 MTRs significant for Severe condition that do not belong to the interest families.

| Gene ID          | Family   | NES         | pValue     |
|------------------|----------|-------------|------------|
| Solyc01g110490.2 | ZF-HD    | -3.15758282 | 0.00159083 |
| Solyc10g077110.1 | tf3a     | -2.97292849 | 0.00294973 |
| Solyc01g111580.2 | BZIP     | -2.96679446 | 0.00300922 |
| Solyc06g060490.2 | BZIP     | 2.82899978  | 0.00466937 |
| Solyc08g062960.2 | Hsf      | -2.54085675 | 0.01105812 |
| Solyc10g081350.1 | BZIP     | -2.52416514 | 0.01159734 |
| Solyc04g009440.2 | NAC      | 2.52231799  | 0.01165843 |
| Solyc02g076810.2 | Trihelix | -2.50120693 | 0.01237708 |

|                  |          |             |            |
|------------------|----------|-------------|------------|
| Solyc08g041820.2 | Homeobox | -2.49909905 | 0.01245095 |
| Solyc12g008660.1 | ZF-HD    | -2.45771029 | 0.01398259 |
